# Supplementary material for: Electronic Health Record-Related Safety Concerns: A Cross-Sectional Survey of Electronic Health Record Users
Source: PubMed Central journal article supplement (PMC4890731; doi:10.2196/medinform.5238), 2016-05-06
Supplement: medinform_v4i2e13_app1.pdf [file medinform_v4i2e13_app1.pdf]

Appendix 1:Table A1. Sum variable means and reliability estimates (N=2,678)

| <b>Variable</b>                                       | <b>Mean of sum variable<sup>a</sup></b> | <b>SE<sup>b</sup> of sum variable</b> | <b>Cronbach's alpha</b> | <b>[95% CI<sup>c</sup>]</b> | <b>Complete cases<sup>d</sup></b> | <b>% Complete cases</b> |
|-------------------------------------------------------|-----------------------------------------|---------------------------------------|-------------------------|-----------------------------|-----------------------------------|-------------------------|
| Incorrect patient identification                      | 2.38                                    | 1.05                                  | .858                    | [0.847 - 0.868]             | 1225                              | 42.7                    |
| Extended EHR unavailability                           | 2.82                                    | 1.04                                  | .864                    | [0.856 - 0.873]             | 996                               | 34.7                    |
| Failure to heed a computer-generated warning or alert | 2.28                                    | 0.92                                  | .866                    | [0.856 - 0.875]             | 983                               | 34.3                    |
| System-to-system interface errors                     | 2.59                                    | 1.08                                  | .880                    | [0.872 - 0.888]             | 983                               | 34.3                    |
| Failure to find or use the most recent patient data   | 2.58                                    | 0.95                                  | .868                    | [0.859 - 0.877]             | 1546                              | 53.9                    |
| EHR time measurement translational challenges         | 2.58                                    | 1.03                                  | .870                    | [0.860 - 0.879]             | 877                               | 30.6                    |
| Incorrect item selected from a list of items          | 2.36                                    | 0.99                                  | .888                    | [0.879 - 0.896]             | 1218                              | 42.5                    |
| Open, incomplete or missing orders                    | 2.74                                    | 1.02                                  | .789                    | [0.773 - 0.803]             | 1389                              | 48.4                    |

<sup>a</sup>Question items were measured on a scale of 1 to 5

<sup>b</sup>SE=Standard Error

<sup>c</sup>CI=Confidence Interval

<sup>d</sup> Respondents who answered every single item in the multi-item scale (between 3 to 6 items/scale)
