# Supplementary material for: Electronic Health Record-Related Safety Concerns: A Cross-Sectional Survey of Electronic Health Record Users
Source: PubMed Central journal article supplement (PMC4890731; doi:10.2196/medinform.5238), 2016-05-06
Supplement: medinform_v4i2e13_app2.pdf [file medinform_v4i2e13_app2.pdf]

Appendix 2: Table A2. Distribution of background variables and proportion of respondents reporting a high or extreme risk severity rating including margin of errors and 95 % confidence intervals for the proportions (N=2,864).

| Variable                          | N    | Percent of all respondents reporting a high risk level (in %) |                 |         |                             |                 |         |                                                       |                 |         |                                   |                 |         |           |
|-----------------------------------|------|---------------------------------------------------------------|-----------------|---------|-----------------------------|-----------------|---------|-------------------------------------------------------|-----------------|---------|-----------------------------------|-----------------|---------|-----------|
|                                   |      | Incorrect patient identification                              |                 |         | Extended EHR unavailability |                 |         | Failure to heed a computer-generated warning or alert |                 |         | System-to-system interface errors |                 |         |           |
|                                   |      | %                                                             | Margin of Error | 95 % CI | %                           | Margin of Error | 95 % CI | %                                                     | Margin of Error | 95 % CI | %                                 | Margin of Error | 95 % CI |           |
| <b>Gender</b>                     |      |                                                               |                 |         |                             |                 |         |                                                       |                 |         |                                   |                 |         |           |
| Female                            | 2439 | 85,2                                                          | 31,6            | 1,85    | 29.8-33.5                   | 49,0            | 1,98    | 47.0-51.0                                             | 30,0            | 1,82    | 28.2-31.9                         | 40,4            | 1,95    | 38.5-42.4 |
| Male                              | 425  | 14,8                                                          | 31,6            | 4,42    | 27.2-36.0                   | 49,0            | 4,75    | 44.3-53.8                                             | 34,2            | 4,51    | 29.7-38.7                         | 46,1            | 4,74    | 41.4-50.9 |
| <b>Age Group</b>                  |      |                                                               |                 |         |                             |                 |         |                                                       |                 |         |                                   |                 |         |           |
| 20-34                             | 637  | 22,2                                                          | 30,7            | 3,58    | 27.1-34.3                   | 47,4            | 3,88    | 43.5-51.3                                             | 28,2            | 3,49    | 24.7-31.7                         | 42,1            | 3,83    | 38.3-45.9 |
| 35-49                             | 1123 | 39,2                                                          | 30,1            | 2,68    | 27.4-32.7                   | 48,5            | 2,92    | 45.6-51.4                                             | 31,1            | 2,71    | 28.4-33.9                         | 41,7            | 2,88    | 38.8-44.6 |
| 50-59                             | 851  | 29,7                                                          | 31,7            | 3,13    | 28.6-34.8                   | 49,5            | 3,36    | 46.1-52.9                                             | 30,9            | 3,11    | 27.8-34                           | 39,9            | 3,29    | 36.6-43.2 |
| 60+                               | 252  | 8,8                                                           | 41,2            | 6,08    | 35.1-47.3                   | 53,4            | 6,16    | 47.3-59.6                                             | 34,4            | 5,87    | 28.5-40.3                         | 42,2            | 6,10    | 36.1-48.3 |
| <b>Professional Qualification</b> |      |                                                               |                 |         |                             |                 |         |                                                       |                 |         |                                   |                 |         |           |
| Registered Nurses                 | 2044 | 71,4                                                          | 31,9            | 2,02    | 29.8-33.9                   | 47,9            | 2,17    | 45.8-50.1                                             | 28,4            | 1,96    | 26.5-30.4                         | 38,3            | 2,11    | 36.2-40.4 |
| Physicians                        | 433  | 15,1                                                          | 36,2            | 4,53    | 31.7-40.7                   | 65,2            | 4,49    | 60.7-69.7                                             | 45,2            | 4,69    | 40.5-49.8                         | 59,9            | 4,62    | 55.3-64.5 |
| Clinical Clerks                   | 246  | 8,6                                                           | 28,2            | 5,63    | 22.6-33.9                   | 40,4            | 6,13    | 34.3-46.6                                             | 22,9            | 5,25    | 17.6-28.1                         | 35,4            | 5,98    | 29.4-41.4 |
| Academic specialists              | 141  | 4,9                                                           | 17,4            | 6,26    | 11.2-23.7                   | 26,4            | 7,27    | 19.1-33.6                                             | 22,0            | 6,84    | 15.1-28.8                         | 29,0            | 7,49    | 21.5-36.5 |
| <b>Education</b>                  |      |                                                               |                 |         |                             |                 |         |                                                       |                 |         |                                   |                 |         |           |
| RN or other polytechnic degree    | 1627 | 56,8                                                          | 31,5            | 2,26    | 29.3-33.8                   | 47,4            | 2,43    | 44.9-49.8                                             | 27,8            | 2,18    | 25.7-30                           | 37,7            | 2,36    | 35.4-40.1 |
| Vocational Training               | 394  | 13,8                                                          | 30,8            | 4,56    | 26.3-35.4                   | 44,7            | 4,91    | 39.7-49.6                                             | 25,3            | 4,29    | 21-29.5                           | 33,9            | 4,67    | 29.2-38.6 |
| Other Tertiary Education          | 142  | 5,0                                                           | 38,9            | 8,02    | 30.9-47.0                   | 52,2            | 8,22    | 44.0-60.4                                             | 34,5            | 7,82    | 26.7-42.3                         | 46,7            | 8,21    | 38.5-54.9 |
| Master's Degree/ MD               | 437  | 15,3                                                          | 28,4            | 4,23    | 24.1-32.6                   | 55,0            | 4,66    | 50.3-59.7                                             | 40,8            | 4,61    | 36.2-45.4                         | 54,1            | 4,67    | 49.5-58.8 |
| PhD                               | 188  | 6,6                                                           | 36,7            | 6,89    | 29.8-43.6                   | 59,0            | 7,03    | 52.0-66.0                                             | 39,1            | 6,97    | 32.1-46                           | 54,7            | 7,12    | 47.6-61.8 |
| Other                             | 76   | 2,7                                                           | 30,2            | 10,32   | 19.8-40.5                   | 38,6            | 10,94   | 27.6-49.5                                             | 24,6            | 9,68    | 14.9-34.2                         | 30,5            | 10,35   | 20.2-40.9 |
| <b>Clinical Unit</b>              |      |                                                               |                 |         |                             |                 |         |                                                       |                 |         |                                   |                 |         |           |
| Clinical Laboratory/Radiology     | 334  | 11,7                                                          | 35,3            | 5,12    | 30.2-40.4                   | 38,5            | 5,22    | 33.2-43.7                                             | 16,9            | 4,02    | 12.9-20.9                         | 34,7            | 5,11    | 29.6-39.8 |
| Emergency room                    | 159  | 5,6                                                           | 44,8            | 7,73    | 37.1-52.5                   | 58,8            | 7,65    | 51.2-66.5                                             | 39,3            | 7,59    | 31.7-46.9                         | 51,0            | 7,77    | 43.3-58.8 |
| General Ward                      | 883  | 30,8                                                          | 29,4            | 3,01    | 26.4-32.4                   | 49,9            | 3,30    | 46.6-53.2                                             | 32,5            | 3,09    | 29.4-35.6                         | 39,1            | 3,22    | 35.9-42.3 |
| ICU/CCU                           | 176  | 6,1                                                           | 27,7            | 6,61    | 21.1-34.3                   | 51,2            | 7,38    | 43.8-58.6                                             | 26,1            | 6,48    | 19.6-32.5                         | 51,8            | 7,38    | 44.4-59.2 |
| Labor ward                        | 73   | 2,5                                                           | 22,2            | 9,54    | 12.7-31.8                   | 45,1            | 11,41   | 33.7-56.5                                             | 31,3            | 10,64   | 20.7-42                           | 35,8            | 11,00   | 24.8-46.8 |
| OR or procedure unit              | 301  | 10,5                                                          | 44,6            | 5,62    | 38.9-50.2                   | 63,4            | 5,44    | 57.9-68.8                                             | 35,7            | 5,41    | 30.3-41.2                         | 54,8            | 5,62    | 49.2-60.4 |
| Outpatient unit                   | 755  | 26,4                                                          | 26,2            | 3,14    | 23.1-29.4                   | 46,7            | 3,56    | 43.1-50.2                                             | 30,0            | 3,27    | 26.7-33.2                         | 37,0            | 3,44    | 33.6-40.4 |
| Other                             | 183  | 6,4                                                           | 30,9            | 6,69    | 24.2-37.6                   | 38,8            | 7,06    | 31.7-45.8                                             | 30,6            | 6,68    | 24-37.3                           | 40,3            | 7,11    | 33.2-47.4 |

|                             |             | <b>Percent of all respondents reporting a high risk level (in %)</b> |             |                        |                                    |             |                        |                                                              |             |                        |                                          |             |                        |                  |
|-----------------------------|-------------|----------------------------------------------------------------------|-------------|------------------------|------------------------------------|-------------|------------------------|--------------------------------------------------------------|-------------|------------------------|------------------------------------------|-------------|------------------------|------------------|
|                             |             | <b>Incorrect patient identification</b>                              |             |                        | <b>Extended EHR unavailability</b> |             |                        | <b>Failure to heed a computer-generated warning or alert</b> |             |                        | <b>System-to-system interface errors</b> |             |                        |                  |
| <b>Variable</b>             | <b>N</b>    | <b>%</b>                                                             | <b>%</b>    | <b>Margin of Error</b> | <b>95 % CI</b>                     | <b>%</b>    | <b>Margin of Error</b> | <b>95 % CI</b>                                               | <b>%</b>    | <b>Margin of Error</b> | <b>95 % CI</b>                           | <b>%</b>    | <b>Margin of Error</b> | <b>95 % CI</b>   |
| <b>Work Experience</b>      |             |                                                                      |             |                        |                                    |             |                        |                                                              |             |                        |                                          |             |                        |                  |
| 0-5 years                   | 614         | 21,4                                                                 | 28,8        | 3,58                   | 25.2-32.4                          | 44,2        | 3,93                   | 40.3-48.1                                                    | 27,0        | 3,51                   | 23.5-30.5                                | 40,2        | 3,88                   | 36.3-44.1        |
| 6-15 years                  | 974         | 34,0                                                                 | 31,2        | 2,91                   | 28.3-34.1                          | 49,2        | 3,14                   | 46.1-52.4                                                    | 32,0        | 2,93                   | 29.1-34.9                                | 42,0        | 3,10                   | 38.9-45.1        |
| 16-25 years                 | 659         | 23,0                                                                 | 29,6        | 3,49                   | 26.1-33.1                          | 51,1        | 3,82                   | 47.3-54.9                                                    | 31,6        | 3,55                   | 28-35.1                                  | 42,5        | 3,77                   | 38.7-46.3        |
| 25+ years                   | 617         | 21,5                                                                 | 37,6        | 3,82                   | 33.8-41.4                          | 51,0        | 3,94                   | 47.1-55.0                                                    | 31,4        | 3,66                   | 27.7-35                                  | 40,2        | 3,87                   | 36.3-44.1        |
| <b>Frequency of EHR Use</b> |             |                                                                      |             |                        |                                    |             |                        |                                                              |             |                        |                                          |             |                        |                  |
| Several times per shift     | 2640        | 92,2                                                                 | 31,8        | 1,78                   | 30.1-33.6                          | 49,4        | 1,91                   | 47.5-51.3                                                    | 30,5        | 1,76                   | 28.7-32.2                                | 41,6        | 1,88                   | 39.7-43.5        |
| Less often                  | 224         | 7,8                                                                  | 29,1        | 5,95                   | 23.2-35.1                          | 43,5        | 6,49                   | 37.0-49.9                                                    | 33,5        | 6,18                   | 27.4-39.7                                | 38,1        | 6,36                   | 31.7-44.4        |
| <b>EHR Training Mode</b>    |             |                                                                      |             |                        |                                    |             |                        |                                                              |             |                        |                                          |             |                        |                  |
| Classroom                   | 610         | 21,3                                                                 | 29,0        | 3,60                   | 25.4-32.6                          | 49,5        | 3,97                   | 45.5-53.4                                                    | 32,4        | 3,71                   | 28.7-36.1                                | 40,7        | 3,90                   | 36.8-44.6        |
| eLearning                   | 880         | 30,7                                                                 | 28,1        | 2,97                   | 25.2-31.1                          | 44,8        | 3,29                   | 41.6-48.1                                                    | 26,2        | 2,90                   | 23.3-29.1                                | 38,3        | 3,21                   | 35.1-41.5        |
| General                     | 803         | 28,0                                                                 | 34,8        | 3,29                   | 31.5-38.1                          | 51,5        | 3,46                   | 48.0-54.9                                                    | 32,2        | 3,23                   | 29-35.5                                  | 43,0        | 3,42                   | 39.5-46.4        |
| IT Support                  | 304         | 10,6                                                                 | 34,3        | 5,34                   | 28.9-39.6                          | 49,0        | 5,62                   | 43.4-54.6                                                    | 30,8        | 5,19                   | 25.6-36                                  | 41,8        | 5,54                   | 36.2-47.3        |
| Other/no training           | 267         | 9,3                                                                  | 37,0        | 5,79                   | 31.2-42.8                          | 54,1        | 5,98                   | 48.1-60.1                                                    | 38,1        | 5,82                   | 32.3-43.9                                | 47,9        | 5,99                   | 41.9-53.9        |
| <b>EHR Skills Level</b>     |             |                                                                      |             |                        |                                    |             |                        |                                                              |             |                        |                                          |             |                        |                  |
| Good                        | 793         | 27,7                                                                 | 28,9        | 3,15                   | 25.7-32.0                          | 49,1        | 3,48                   | 45.6-52.6                                                    | 28,4        | 3,14                   | 25.2-31.5                                | 40,3        | 3,41                   | 36.9-43.7        |
| Fair                        | 1590        | 55,5                                                                 | 30,6        | 2,26                   | 28.3-32.8                          | 47,9        | 2,46                   | 45.4-50.3                                                    | 29,1        | 2,23                   | 26.8-31.3                                | 40,4        | 2,41                   | 38-42.8          |
| Poor                        | 481         | 16,8                                                                 | 40,0        | 4,38                   | 35.7-44.4                          | 52,6        | 4,46                   | 48.2-57.1                                                    | 39,8        | 4,38                   | 35.5-44.2                                | 46,4        | 4,46                   | 41.9-50.9        |
| <b>Total</b>                | <b>2864</b> | <b>100,0</b>                                                         | <b>31,6</b> | <b>1,70</b>            | <b>29.9-33.3</b>                   | <b>49,0</b> | <b>1,83</b>            | <b>47.1-50.8</b>                                             | <b>30,7</b> | <b>1,69</b>            | <b>29.0-32.4</b>                         | <b>41,3</b> | <b>1,80</b>            | <b>39.5-43.1</b> |

|                  |          | <b>Percent of all respondents reporting a high risk level (in %)</b> |          |                        |                                                      |          |                        |                                                     |          |                        |                                           |          |                        |                |
|------------------|----------|----------------------------------------------------------------------|----------|------------------------|------------------------------------------------------|----------|------------------------|-----------------------------------------------------|----------|------------------------|-------------------------------------------|----------|------------------------|----------------|
|                  |          | <b>Failure to find or use the most recent patient data</b>           |          |                        | <b>EHR time measurement translational challenges</b> |          |                        | <b>Incorrect item selected from a list of items</b> |          |                        | <b>Open, incomplete or missing orders</b> |          |                        |                |
| <b>Variable</b>  | <b>N</b> | <b>%</b>                                                             | <b>%</b> | <b>Margin of Error</b> | <b>95 % CI</b>                                       | <b>%</b> | <b>Margin of Error</b> | <b>95 % CI</b>                                      | <b>%</b> | <b>Margin of Error</b> | <b>95 % CI</b>                            | <b>%</b> | <b>Margin of Error</b> | <b>95 % CI</b> |
| <b>Gender</b>    |          |                                                                      |          |                        |                                                      |          |                        |                                                     |          |                        |                                           |          |                        |                |
| Female           | 2439     | 85,2                                                                 | 41,5     | 1,96                   | 39.6-43.5                                            | 35,7     | 1,90                   | 33.8-37.6                                           | 26,7     | 1,76                   | 24.9-28.4                                 | 40,3     | 1,95                   | 38.3-42.2      |
| Male             | 425      | 14,8                                                                 | 48,7     | 4,75                   | 44.0-53.5                                            | 40,9     | 4,67                   | 36.2-45.5                                           | 33,3     | 4,48                   | 28.9-37.8                                 | 42,5     | 4,70                   | 37.8-47.2      |
| <b>Age Group</b> |          |                                                                      |          |                        |                                                      |          |                        |                                                     |          |                        |                                           |          |                        |                |
| 20-34            | 637      | 22,2                                                                 | 41,8     | 3,83                   | 38.0-45.7                                            | 33,4     | 3,66                   | 29.7-37.1                                           | 25,7     | 3,39                   | 22.3-29.1                                 | 40,6     | 3,81                   | 36.8-44.5      |
| 35-49            | 1123     | 39,2                                                                 | 43,0     | 2,90                   | 40.1-45.9                                            | 37,9     | 2,84                   | 35.0-40.7                                           | 27,5     | 2,61                   | 24.9-30.1                                 | 43,5     | 2,90                   | 40.6-46.4      |
| 50-59            | 851      | 29,7                                                                 | 42,7     | 3,32                   | 39.4-46.0                                            | 36,9     | 3,24                   | 33.6-40.1                                           | 29,9     | 3,07                   | 26.8-32.9                                 | 38,6     | 3,27                   | 35.3-41.9      |
| 60+              | 252      | 8,8                                                                  | 42,4     | 6,10                   | 36.3-48.5                                            | 37,9     | 5,99                   | 31.9-43.9                                           | 27,7     | 5,52                   | 22.1-33.2                                 | 33,7     | 5,84                   | 27.9-39.5      |

| Variable                          | N    | Percent of all respondents reporting a high risk level (in %) |                                                     |           |           |                                               |           |           |                                              |           |           |                                    |           |           |
|-----------------------------------|------|---------------------------------------------------------------|-----------------------------------------------------|-----------|-----------|-----------------------------------------------|-----------|-----------|----------------------------------------------|-----------|-----------|------------------------------------|-----------|-----------|
|                                   |      | %                                                             | Failure to find or use the most recent patient data |           |           | EHR time measurement translational challenges |           |           | Incorrect item selected from a list of items |           |           | Open, incomplete or missing orders |           |           |
|                                   |      |                                                               | %                                                   | Margin of |           | %                                             | Margin of |           | %                                            | Margin of |           | %                                  | Margin of |           |
|                                   |      |                                                               |                                                     | Error     | 95 % CI   |                                               | Error     | 95 % CI   |                                              | Error     | 95 % CI   |                                    | Error     | 95 % CI   |
| <b>Professional Qualification</b> |      |                                                               |                                                     |           |           |                                               |           |           |                                              |           |           |                                    |           |           |
| Registered Nurses                 | 2044 | 71,4                                                          | 40,1                                                | 2,13      | 38.0-42.3 | 35,8                                          | 2,08      | 33.7-37.9 | 25,4                                         | 1,89      | 23.5-27.3 | 40,4                               | 2,13      | 38.3-42.6 |
| Physicians                        | 433  | 15,1                                                          | 63,1                                                | 4,54      | 58.6-67.7 | 47,8                                          | 4,70      | 43.1-52.5 | 41,7                                         | 4,64      | 37.0-46.3 | 48,0                               | 4,71      | 43.3-52.7 |
| Clinical Clerks                   | 246  | 8,6                                                           | 30,7                                                | 5,76      | 24.9-36.5 | 22,0                                          | 5,18      | 16.8-27.2 | 23,9                                         | 5,33      | 18.6-29.2 | 37,4                               | 6,05      | 31.4-43.5 |
| Academic specialists              | 141  | 4,9                                                           | 29,8                                                | 7,55      | 22.3-37.4 | 20,3                                          | 6,64      | 13.7-26.9 | 17,5                                         | 6,28      | 11.3-23.8 | 18,2                               | 6,37      | 11.8-24.5 |
| <b>Education</b>                  |      |                                                               |                                                     |           |           |                                               |           |           |                                              |           |           |                                    |           |           |
| RN or other polytechnic degree    | 1627 | 56,8                                                          | 40,1                                                | 2,38      | 37.7-42.4 | 35,0                                          | 2,32      | 32.6-37.3 | 25,1                                         | 2,11      | 23.0-27.3 | 41,0                               | 2,39      | 38.6-43.4 |
| Vocational Training               | 394  | 13,8                                                          | 31,5                                                | 4,59      | 26.9-36.1 | 31,3                                          | 4,58      | 26.7-35.8 | 23,5                                         | 4,19      | 19.3-27.7 | 33,3                               | 4,65      | 28.7-38.0 |
| Other Tertiary Education          | 142  | 5,0                                                           | 46,2                                                | 8,20      | 38.0-54.4 | 40,0                                          | 8,06      | 31.9-48.1 | 31,6                                         | 7,65      | 24.0-39.3 | 43,4                               | 8,15      | 35.2-51.5 |
| Master's Degree/ MD               | 437  | 15,3                                                          | 55,3                                                | 4,66      | 50.6-59.9 | 44,1                                          | 4,65      | 39.4-48.7 | 34,7                                         | 4,46      | 30.2-39.2 | 41,2                               | 4,61      | 36.5-45.8 |
| PhD                               | 188  | 6,6                                                           | 53,9                                                | 7,13      | 46.8-61.0 | 41,1                                          | 7,03      | 34.0-48.1 | 40,1                                         | 7,01      | 33.1-47.1 | 47,6                               | 7,14      | 40.5-54.7 |
| Other                             | 76   | 2,7                                                           | 43,3                                                | 11,14     | 32.1-54.4 | 30,2                                          | 10,32     | 19.9-40.5 | 21,7                                         | 9,26      | 12.4-30.9 | 41,9                               | 11,09     | 30.8-53.0 |
| <b>Clinical Unit</b>              |      |                                                               |                                                     |           |           |                                               |           |           |                                              |           |           |                                    |           |           |
| Clinical Laboratory/Radiology     | 334  | 11,7                                                          | 37,6                                                | 5,19      | 32.4-42.8 | 29,1                                          | 4,87      | 24.2-34.0 | 22,1                                         | 4,45      | 17.6-26.5 | 22,6                               | 4,49      | 18.1-27.1 |
| Emergency room                    | 159  | 5,6                                                           | 59,7                                                | 7,62      | 52.1-67.4 | 52,2                                          | 7,76      | 44.4-60.0 | 34,7                                         | 7,40      | 27.3-42.1 | 62,9                               | 7,51      | 55.4-70.4 |
| General Ward                      | 883  | 30,8                                                          | 41,8                                                | 3,25      | 38.5-45.0 | 35,0                                          | 3,15      | 31.9-38.2 | 27,7                                         | 2,95      | 24.8-30.7 | 41,6                               | 3,25      | 38.4-44.9 |
| ICU/CCU                           | 176  | 6,1                                                           | 44,0                                                | 7,33      | 36.6-51.3 | 40,5                                          | 7,25      | 33.3-47.8 | 28,8                                         | 6,69      | 22.1-35.4 | 44,3                               | 7,34      | 37.0-51.6 |
| Labor ward                        | 73   | 2,5                                                           | 38,0                                                | 11,14     | 26.9-49.2 | 23,6                                          | 9,75      | 13.9-33.4 | 16,7                                         | 8,55      | 8.1-25.2  | 35,3                               | 10,96     | 24.3-46.3 |
| OR or procedure unit              | 301  | 10,5                                                          | 56,2                                                | 5,61      | 50.6-61.8 | 51,3                                          | 5,65      | 45.6-56.9 | 37,9                                         | 5,48      | 32.4-43.4 | 52,8                               | 5,64      | 47.2-58.5 |
| Outpatient unit                   | 755  | 26,4                                                          | 37,2                                                | 3,45      | 33.8-40.7 | 31,3                                          | 3,31      | 28.0-34.6 | 25,4                                         | 3,10      | 22.3-28.5 | 33,4                               | 3,37      | 30.1-36.8 |
| Other                             | 183  | 6,4                                                           | 38,9                                                | 7,06      | 31.8-46.0 | 37,8                                          | 7,03      | 30.8-44.9 | 25,8                                         | 6,34      | 19.4-32.1 | 37,7                               | 7,02      | 30.7-44.7 |
| <b>Work Experience</b>            |      |                                                               |                                                     |           |           |                                               |           |           |                                              |           |           |                                    |           |           |
| 0-5 years                         | 614  | 21,4                                                          | 36,8                                                | 3,82      | 33.0-40.6 | 30,2                                          | 3,63      | 26.5-33.8 | 22,6                                         | 3,31      | 19.3-25.9 | 38,5                               | 3,85      | 34.6-42.3 |
| 6-15 years                        | 974  | 34,0                                                          | 44,0                                                | 3,12      | 40.9-47.1 | 38,0                                          | 3,05      | 34.9-41.0 | 28,8                                         | 2,85      | 26.0-31.7 | 42,9                               | 3,11      | 39.8-46.0 |
| 16-25 years                       | 659  | 23,0                                                          | 44,5                                                | 3,79      | 40.7-48.3 | 40,8                                          | 3,75      | 37.1-44.6 | 28,3                                         | 3,44      | 24.8-31.7 | 41,8                               | 3,77      | 38.1-45.6 |
| 25+ years                         | 617  | 21,5                                                          | 44,2                                                | 3,92      | 40.3-48.1 | 36,2                                          | 3,79      | 32.4-40.0 | 30,9                                         | 3,64      | 27.2-34.5 | 37,6                               | 3,82      | 33.8-41.4 |
| <b>Frequency of EHR Use</b>       |      |                                                               |                                                     |           |           |                                               |           |           |                                              |           |           |                                    |           |           |
| Several times per shift           | 2640 | 92,2                                                          | 43,0                                                | 1,89      | 41.1-44.9 | 36,7                                          | 1,84      | 34.9-38.6 | 27,7                                         | 1,71      | 26.0-29.4 | 40,7                               | 1,87      | 38.8-42.6 |
| Less often                        | 224  | 7,8                                                           | 37,0                                                | 6,32      | 30.7-43.3 | 34,3                                          | 6,22      | 28.1-40.5 | 28,5                                         | 5,91      | 22.6-34.4 | 39,7                               | 6,41      | 33.3-46.1 |

| Variable                 | N           | Percent of all respondents reporting a high risk level (in %) |                                                     |             |                  |                                               |             |                  |                                              |             |                  |                                    |             |                  |
|--------------------------|-------------|---------------------------------------------------------------|-----------------------------------------------------|-------------|------------------|-----------------------------------------------|-------------|------------------|----------------------------------------------|-------------|------------------|------------------------------------|-------------|------------------|
|                          |             | %                                                             | Failure to find or use the most recent patient data |             |                  | EHR time measurement translational challenges |             |                  | Incorrect item selected from a list of items |             |                  | Open, incomplete or missing orders |             |                  |
|                          |             |                                                               | %                                                   | Margin of   |                  | %                                             | Margin of   |                  | %                                            | Margin of   |                  | %                                  | Margin of   |                  |
|                          |             |                                                               |                                                     | Error       | 95 % CI          |                                               | Error       | 95 % CI          |                                              | Error       | 95 % CI          |                                    | Error       | 95 % CI          |
| <b>EHR Training Mode</b> |             |                                                               |                                                     |             |                  |                                               |             |                  |                                              |             |                  |                                    |             |                  |
| Classroom                | 610         | 21,3                                                          | 43,4                                                | 3,93        | 39.5-47.4        | 37,7                                          | 3,85        | 33.8-41.5        | 25,3                                         | 3,45        | 21.9-28.8        | 39,3                               | 3,88        | 35.4-43.1        |
| eLearning                | 880         | 30,7                                                          | 38,3                                                | 3,21        | 35.1-41.5        | 33,8                                          | 3,13        | 30.7-36.9        | 25,4                                         | 2,88        | 22.5-28.3        | 38,2                               | 3,21        | 35.0-41.4        |
| General                  | 803         | 28,0                                                          | 43,7                                                | 3,43        | 40.3-47.2        | 37,7                                          | 3,35        | 34.3-41.0        | 29,9                                         | 3,17        | 26.7-33.0        | 44,6                               | 3,44        | 41.1-48.0        |
| IT Support               | 304         | 10,6                                                          | 46,0                                                | 5,60        | 40.4-51.6        | 35,9                                          | 5,39        | 30.5-41.3        | 28,4                                         | 5,07        | 23.3-33.4        | 38,1                               | 5,46        | 32.7-43.6        |
| Other/no training        | 267         | 9,3                                                           | 48,4                                                | 5,99        | 42.4-54.4        | 41,0                                          | 5,90        | 35.1-46.9        | 35,0                                         | 5,72        | 29.3-40.7        | 43,7                               | 5,95        | 37.8-49.7        |
| <b>EHR Skills Level</b>  |             |                                                               |                                                     |             |                  |                                               |             |                  |                                              |             |                  |                                    |             |                  |
| Good                     | 793         | 27,7                                                          | 39,0                                                | 3,39        | 35.6-42.4        | 36,5                                          | 3,35        | 33.1-39.8        | 25,6                                         | 3,04        | 22.6-28.7        | 43,7                               | 3,45        | 40.3-47.2        |
| Fair                     | 1590        | 55,5                                                          | 42,9                                                | 2,43        | 40.4-45.3        | 34,8                                          | 2,34        | 32.4-37.1        | 27,6                                         | 2,20        | 25.4-29.8        | 38,1                               | 2,39        | 35.7-40.5        |
| Poor                     | 481         | 16,8                                                          | 48,1                                                | 4,47        | 43.6-52.6        | 43,0                                          | 4,42        | 38.6-47.4        | 31,6                                         | 4,16        | 27.5-35.8        | 44,2                               | 4,44        | 39.8-48.7        |
| <b>Total</b>             | <b>2864</b> | <b>100,0</b>                                                  | <b>42,6</b>                                         | <b>1,81</b> | <b>40.8-44.4</b> | <b>36,6</b>                                   | <b>1,76</b> | <b>34.8-38.3</b> | <b>27,7</b>                                  | <b>1,64</b> | <b>26.1-29.4</b> | <b>40,6</b>                        | <b>1,80</b> | <b>38.8-42.4</b> |
