# Supplementary material for: Electronic Health Record-Related Safety Concerns: A Cross-Sectional Survey of Electronic Health Record Users
Source: PubMed Central journal article supplement (PMC4890731; doi:10.2196/medinform.5238), 2016-05-06
Supplement: medinform_v4i2e13_app4.pdf [file medinform_v4i2e13_app4.pdf]

Appendix 3: Table A3. Proportion of high risk according to respondents' professions and clinical unit (+95% confidence intervals) by risk type including margin of errors and 95 % confidence intervals for the proportions (N=2,864).

|                         |                                   | <b>Percent of all respondents reporting a high risk level (in %)</b> |                                         |                 |             |                                    |                 |             |                                                              |                 |             |                                          |                 |             |                  |
|-------------------------|-----------------------------------|----------------------------------------------------------------------|-----------------------------------------|-----------------|-------------|------------------------------------|-----------------|-------------|--------------------------------------------------------------|-----------------|-------------|------------------------------------------|-----------------|-------------|------------------|
| <b>Clinical Unit</b>    | <b>Professional Qualification</b> | N                                                                    | <b>Incorrect patient identification</b> |                 |             | <b>Extended EHR unavailability</b> |                 |             | <b>Failure to heed a computer-generated warning or alert</b> |                 |             | <b>System-to-system interface errors</b> |                 |             |                  |
|                         |                                   |                                                                      | %                                       | Margin of Error | 95 % CI     | %                                  | Margin of Error | 95 % CI     | %                                                            | Margin of Error | 95 % CI     | %                                        | Margin of Error | 95 % CI     |                  |
| Clinical Lab /Radiology | Registered Nurses                 | 254                                                                  | 8,9                                     | 39,8            | 6,02        | 33.8-45.9                          | 39,3            | 6,01        | 33.3-45.3                                                    | 17,9            | 4,72        | 13.2-22.7                                | 33,5            | 5,80        | 27.7-39.3        |
|                         | Physicians                        | 42                                                                   | 1,5                                     | 22,5            | 12,63       | 9.9-35.1                           | 37,5            | 14,64       | 22.9-52.1                                                    | 16,7            | 11,27       | 5.4-27.9                                 | 39,5            | 14,78       | 24.7-54.3        |
|                         | Other                             | 38                                                                   | 1,3                                     | 18,2            | 12,26       | 5.9-30.4                           | 33,3            | 14,99       | 18.3-48.3                                                    | 9,5             | 9,33        | 0.2-18.9                                 | 37,9            | 15,43       | 22.5-53.4        |
| Emergency               | Registered Nurses                 | 118                                                                  | 4,1                                     | 44,7            | 8,97        | 35.8-53.7                          | 56,6            | 8,94        | 47.7-65.6                                                    | 34,5            | 8,58        | 26.0-43.1                                | 43,4            | 8,94        | 34.4-52.3        |
|                         | Physicians                        | 24                                                                   | 0,8                                     | 37,5            | 19,37       | 18.1-56.9                          | 65,2            | 19,05       | 46.2-84.3                                                    | 59,1            | 19,67       | 39.4-78.8                                | 86,4            | 13,73       | 72.6-100.1       |
|                         | Other                             | 17                                                                   | 0,6                                     | 56,3            | 23,58       | 32.7-79.8                          | 64,7            | 22,72       | 42.0-87.4                                                    | 46,2            | 23,70       | 22.5-69.9                                | 58,3            | 23,44       | 34.9-81.8        |
| General Ward            | Registered Nurses                 | 704                                                                  | 24,6                                    | 30,4            | 3,40        | 27.0-33.8                          | 49,2            | 3,69        | 45.5-52.9                                                    | 31,0            | 3,42        | 27.6-34.5                                | 38,3            | 3,59        | 34.7-41.9        |
|                         | Physicians                        | 85                                                                   | 3,0                                     | 28,4            | 9,59        | 18.8-38.0                          | 71,8            | 9,57        | 62.2-81.3                                                    | 53,7            | 10,60       | 43.1-64.3                                | 56,6            | 10,54       | 46.1-67.2        |
|                         | Other                             | 94                                                                   | 3,3                                     | 22,4            | 8,42        | 13.9-30.8                          | 34,4            | 9,61        | 24.8-44.1                                                    | 18,8            | 7,89        | 10.9-26.6                                | 25,4            | 8,79        | 16.6-34.1        |
| ICU/CCU                 | Registered Nurses                 | 150                                                                  | 5,2                                     | 28,1            | 7,20        | 21.0-35.3                          | 50,3            | 8,00        | 42.3-58.4                                                    | 24,4            | 6,87        | 17.5-31.2                                | 50,0            | 8,00        | 42.0-58.0        |
|                         | Physicians                        | 15                                                                   | 0,5                                     | 21,4            | 20,76       | 0.7-42.2                           | 64,3            | 24,25       | 40.0-88.5                                                    | 30,8            | 23,36       | 7.4-54.1                                 | 73,3            | 22,38       | 51.0-95.7        |
|                         | Other                             | 11                                                                   | 0,4                                     | 30,0            | 27,08       | 2.9-57.1                           | 45,5            | 29,43       | 16.0-74.9                                                    | 40,0            | 28,95       | 11.0-69.0                                | 44,4            | 29,36       | 15.1-73.8        |
| OR/<br>procedure unit   | Registered Nurses                 | 186                                                                  | 6,5                                     | 42,9            | 7,11        | 35.7-50.0                          | 59,3            | 7,06        | 52.3-66.4                                                    | 30,5            | 6,62        | 23.9-37.1                                | 46,7            | 7,17        | 39.5-53.9        |
|                         | Physicians                        | 98                                                                   | 3,4                                     | 47,3            | 9,88        | 37.4-57.2                          | 74,0            | 8,69        | 65.3-82.6                                                    | 46,4            | 9,87        | 36.5-56.3                                | 71,3            | 8,96        | 62.3-80.2        |
|                         | Other                             | 17                                                                   | 0,6                                     | 47,1            | 23,73       | 23.3-70.8                          | 47,1            | 23,73       | 23.3-70.8                                                    | 16,7            | 17,72       | -1-34.4                                  | 36,4            | 22,87       | 13.5-59.2        |
| Outpatient unit         | Registered Nurses                 | 435                                                                  | 15,2                                    | 23,8            | 4,00        | 19.8-27.8                          | 47,0            | 4,69        | 42.3-51.7                                                    | 26,6            | 4,15        | 22.4-30.7                                | 33,8            | 4,45        | 29.3-38.2        |
|                         | Physicians                        | 138                                                                  | 4,8                                     | 38,8            | 8,13        | 30.6-46.9                          | 62,5            | 8,08        | 54.4-70.6                                                    | 45,0            | 8,30        | 36.7-53.3                                | 50,4            | 8,34        | 42.0-58.7        |
|                         | Other                             | 182                                                                  | 6,4                                     | 21,9            | 6,01        | 15.9-27.9                          | 33,1            | 6,84        | 26.3-40.0                                                    | 24,1            | 6,21        | 17.9-30.3                                | 32,1            | 6,78        | 25.3-38.8        |
| Other                   | Registered Nurses                 | 197                                                                  | 6,9                                     | 28,0            | 6,27        | 21.7-34.3                          | 38,3            | 6,79        | 31.5-45.0                                                    | 30,0            | 6,40        | 23.6-36.4                                | 32,3            | 6,53        | 25.8-38.8        |
|                         | Physicians                        | 31                                                                   | 1,1                                     | 35,7            | 16,87       | 18.8-52.6                          | 67,7            | 16,46       | 51.3-84.2                                                    | 42,9            | 17,42       | 25.4-60.3                                | 77,8            | 14,63       | 63.1-92.4        |
|                         | Other                             | 28                                                                   | 1,0                                     | 16,7            | 13,80       | 2.9-30.5                           | 22,7            | 15,52       | 7.2-38.2                                                     | 15,4            | 13,36       | 2.0-28.7                                 | 40,0            | 18,15       | 21.9-58.1        |
| <b>Total</b>            | <b>Total</b>                      | <b>2864</b>                                                          | <b>100,0</b>                            | <b>31,6</b>     | <b>1,70</b> | <b>29.9-33.3</b>                   | <b>49,0</b>     | <b>1,83</b> | <b>47.1-50.8</b>                                             | <b>30,7</b>     | <b>1,69</b> | <b>29.0-32.4</b>                         | <b>41,3</b>     | <b>1,80</b> | <b>39.5-43.1</b> |

|                          |                                   | <b>Percent of all respondents reporting a high risk level (in %)</b> |              |                                                            |                 |                  |                                                      |                 |                  |                                                     |                 |                  |                                           |                 |                  |
|--------------------------|-----------------------------------|----------------------------------------------------------------------|--------------|------------------------------------------------------------|-----------------|------------------|------------------------------------------------------|-----------------|------------------|-----------------------------------------------------|-----------------|------------------|-------------------------------------------|-----------------|------------------|
| <b>Clinical Unit</b>     | <b>Professional Qualification</b> | N                                                                    | %            | <b>Failure to find or use the most recent patient data</b> |                 |                  | <b>EHR time measurement translational challenges</b> |                 |                  | <b>Incorrect item selected from a list of items</b> |                 |                  | <b>Open, incomplete or missing orders</b> |                 |                  |
|                          |                                   |                                                                      |              | %                                                          | Margin of Error | 95 % CI          | %                                                    | Margin of Error | 95 % CI          | %                                                   | Margin of Error | 95 % CI          | %                                         | Margin of Error | 95 % CI          |
| Clinical Labc /Radiology | Registered Nurses                 | 254                                                                  | 8,9          | 39,7                                                       | 6,02            | 33.7-45.7        | 29,3                                                 | 5,60            | 23.7-34.9        | 21,0                                                | 5,01            | 16.0-26.0        | 26,2                                      | 5,41            | 20.8-31.6        |
|                          | Physicians                        | 42                                                                   | 1,5          | 42,5                                                       | 14,95           | 27.5-57.5        | 25,7                                                 | 13,22           | 12.5-38.9        | 34,3                                                | 14,36           | 19.9-48.6        | 10,7                                      | 9,35            | 1.4-20.1         |
|                          | Other                             | 38                                                                   | 1,3          | 16,7                                                       | 11,85           | 4.8-28.5         | 32,0                                                 | 14,83           | 17.2-46.8        | 13,8                                                | 10,96           | 2.8-24.8         | 20,0                                      | 12,72           | 7.3-32.7         |
| Emergency r              | Registered Nurses                 | 118                                                                  | 4,1          | 56,0                                                       | 8,96            | 47.1-65          | 51,9                                                 | 9,01            | 42.9-60.9        | 34,5                                                | 8,58            | 26.0-43.1        | 64,0                                      | 8,66            | 55.3-72.6        |
|                          | Physicians                        | 24                                                                   | 0,8          | 87,0                                                       | 13,47           | 73.5-100.4       | 65,2                                                 | 19,05           | 46.2-84.3        | 34,8                                                | 19,05           | 15.7-53.8        | 65,2                                      | 19,05           | 46.2-84.3        |
|                          | Other                             | 17                                                                   | 0,6          | 46,7                                                       | 23,72           | 23.0-70.4        | 22,2                                                 | 19,76           | 2.5-42           | 36,4                                                | 22,87           | 13.5-59.2        | 52,9                                      | 23,73           | 29.2-76.7        |
| General War              | Registered Nurses                 | 704                                                                  | 24,6         | 39,6                                                       | 3,61            | 36.0-43.2        | 34,8                                                 | 3,52            | 31.3-38.3        | 27,4                                                | 3,29            | 24.1-30.7        | 40,4                                      | 3,63            | 36.8-44.1        |
|                          | Physicians                        | 85                                                                   | 3,0          | 69,4                                                       | 9,80            | 59.6-79.2        | 45,7                                                 | 10,59           | 35.1-56.3        | 36,1                                                | 10,21           | 25.9-46.4        | 54,8                                      | 10,58           | 44.2-65.3        |
|                          | Other                             | 94                                                                   | 3,3          | 31,0                                                       | 9,35            | 21.7-40.4        | 22,4                                                 | 8,43            | 14.0-30.8        | 20,0                                                | 8,09            | 11.9-28.1        | 37,0                                      | 9,76            | 27.3-46.8        |
| <b>ICU/CCU</b>           | Registered Nurses                 | 150                                                                  | 5,2          | 41,8                                                       | 7,89            | 33.9-49.7        | 39,1                                                 | 7,81            | 31.3-46.9        | 26,2                                                | 7,03            | 19.1-33.2        | 43,6                                      | 7,94            | 35.7-51.5        |
|                          | Physicians                        | 15                                                                   | 0,5          | 66,7                                                       | 23,86           | 42.8-90.5        | 50,0                                                 | 25,30           | 24.7-75.3        | 57,1                                                | 25,04           | 32.1-82.2        | 42,9                                      | 25,04           | 17.8-67.9        |
|                          | Other                             | 11                                                                   | 0,4          | 40,0                                                       | 28,95           | 11.0-69.0        | 50,0                                                 | 29,55           | 20.5-79.5        | 22,2                                                | 24,57           | -2.3-46.8        | 54,5                                      | 29,43           | 25.1-84.0        |
| OR/procedu               | Registered Nurses                 | 186                                                                  | 6,5          | 49,4                                                       | 7,19            | 42.2-56.6        | 44,3                                                 | 7,14            | 37.1-51.4        | 31,8                                                | 6,69            | 25.1-38.5        | 48,4                                      | 7,18            | 41.2-55.6        |
|                          | Physicians                        | 98                                                                   | 3,4          | 74,0                                                       | 8,69            | 65.3-82.6        | 63,0                                                 | 9,56            | 53.5-72.6        | 48,4                                                | 9,89            | 38.5-58.3        | 61,5                                      | 9,64            | 51.8-71.1        |
|                          | Other                             | 17                                                                   | 0,6          | 20,0                                                       | 19,01           | 1.0-39.0         | 33,3                                                 | 22,41           | 10.9-55.7        | 33,3                                                | 22,41           | 10.9-55.7        | 42,9                                      | 23,52           | 19.3-66.4        |
| Outpatient u             | Registered Nurses                 | 435                                                                  | 15,2         | 33,3                                                       | 4,43            | 28.8-37.7        | 32,7                                                 | 4,41            | 28.3-37.2        | 20,8                                                | 3,81            | 16.9-24.6        | 34,7                                      | 4,47            | 30.2-39.1        |
|                          | Physicians                        | 138                                                                  | 4,8          | 55,1                                                       | 8,30            | 46.8-63.4        | 40,2                                                 | 8,18            | 32.0-48.3        | 41,6                                                | 8,22            | 33.4-49.8        | 39,0                                      | 8,14            | 30.8-47.1        |
|                          | Other                             | 182                                                                  | 6,4          | 32,1                                                       | 6,78            | 25.3-38.8        | 15,1                                                 | 5,20            | 9.9-20.2         | 23,0                                                | 6,12            | 16.9-29.1        | 25,3                                      | 6,32            | 19.0-31.7        |
| Other                    | Registered Nurses                 | 197                                                                  | 6,9          | 37,4                                                       | 6,76            | 30.7-44.2        | 31,3                                                 | 6,48            | 24.9-37.8        | 20,3                                                | 5,61            | 14.6-25.9        | 35,4                                      | 6,68            | 28.8-42.1        |
|                          | Physicians                        | 31                                                                   | 1,1          | 53,6                                                       | 17,56           | 36.0-71.1        | 50,0                                                 | 17,60           | 32.4-67.6        | 42,9                                                | 17,42           | 25.4-60.3        | 52,0                                      | 17,59           | 34.4-69.6        |
|                          | Other                             | 28                                                                   | 1,0          | 25,0                                                       | 16,04           | 9.0-41.0         | 20,0                                                 | 14,82           | 5.2-34.8         | 8,3                                                 | 10,24           | -1.9-18.6        | 26,7                                      | 16,38           | 10.3-43.0        |
| <b>Total</b>             | <b>Total</b>                      | <b>2864</b>                                                          | <b>100,0</b> | <b>42,6</b>                                                | <b>1,81</b>     | <b>40.8-44.4</b> | <b>36,6</b>                                          | <b>1,76</b>     | <b>34.8-38.3</b> | <b>27,7</b>                                         | <b>1,64</b>     | <b>26.1-29.4</b> | <b>40,6</b>                               | <b>1,80</b>     | <b>38.8-42.4</b> |
